# Supplementary material for: A Tribute to Sergey Odinokov
Source: MDPI journal article supplement (doi:10.3390/app12062892), 2022-03-11
Supplement: s1 [file s1]

*Obituary*

# A Tribute to Sergey Odinokov

**Olga I. Odinokova**<sup>1</sup>, **Vasiliy Ya. Kolyuchkin**<sup>2</sup>, **Artem B. Solomashenko**<sup>2</sup>, **Maria V. Shishova**<sup>2,\*</sup>, **Evgenii Yu. Zlokazov**<sup>3</sup>, **Rostislav S. Starikov**<sup>3</sup>, **Nikolay N. Evtikhiev**<sup>3,4</sup>, **Nikolay V. Nikonorov**<sup>5</sup>, **Sergey A. Shoydin**<sup>6</sup>, **Leonid V. Tanin**<sup>7</sup>, **Gennadiy A. Gavrilov**<sup>8</sup>, **Nina M. Ganzherli**<sup>8</sup>, **Anatoliy V. Lukin**<sup>9</sup>, **Andrei N. Melnikov**<sup>9</sup>, **Rosalia Kh. Makaeva**<sup>10</sup>, **Nadezhda K. Pavlycheva**<sup>10</sup>, **Elena N. Bogachevskaya**<sup>11</sup>, **Alkis Lembessis**<sup>12</sup>, **Rajan Thomas**<sup>13</sup>, **Michel Grosmann**<sup>14</sup>, **Michael K. Shevtsov**<sup>15</sup>, **Yves Gentet**<sup>16</sup>, **Sergey G. Kalenkov**<sup>17</sup>, **Olga F. Tikhomirova**<sup>18</sup>, **Natalia L. Istomina**<sup>19</sup>, **Olga V. Andreeva**<sup>5</sup>, **Vladimir Yu. Venediktov**<sup>20,21</sup> and **Nikolay V. Petrov**<sup>5,\*</sup>

<sup>1</sup> CJSC Scientific and Production Company “InfoTech”, 142784 Moscow, Russia; o.odinokova1951@yandex.ru

<sup>2</sup> Department of Radioelectronics and Laser Engineering, Bauman Moscow State Technical University, 105005 Moscow, Russia; vkoluch@bmstu.ru (V.Y.K.); art\_s87@mail.ru (A.B.S.)

<sup>3</sup> Department of Laser Physics, National Research Nuclear University MEPhI, 115409 Moscow, Russia; ezlokazov@gmail.com (E.Y.Z.); rstarikov@mail.ru (R.S.S.); k1121@mail.ru (N.N.E.)

<sup>4</sup> IPG Photonics, 129281 Moscow, Russia

<sup>5</sup> Faculty of Photonics, ITMO University, 197101 St. Petersburg, Russia; nikonorov@oi.ifmo.ru (N.V.N.); olga\_andreeva@mail.ru (O.V.A.)

<sup>6</sup> Department of Photonics and Instrument Engineering, Siberian State University of Geosystems and Technologies, 630108 Novosibirsk, Russia; shoydin@ssga.ru

<sup>7</sup> CJSC Holography Industry, 220012 Minsk, Belarus; leonidtanin@gmail.com

<sup>8</sup> Ioffe Institute, 194021 St. Petersburg, Russia; gga\_holo@mail.ru (G.A.G.); ganzherli.nina@yandex.ru (N.M.G.)

<sup>9</sup> JSC “Scientific and Production Association “State Institute of Applied Optics”, 420075 Kazan, Russia; luk371@yandex.ru (A.V.L.); mr.melnikov@bk.ru (A.N.M.)

<sup>10</sup> Department of Optoelectronic Systems, Kazan National Research Technical University Named after A. N. Tupolev, 420111 Kazan, Russia; roskh2001@mail.ru (R.K.M.); nkpavlych@rambler.ru (N.K.P.)

<sup>11</sup> HoloGrate, 190013 St. Petersburg, Russia; elena@holograte.net

<sup>12</sup> Hellenic Institute of Holography, 15234 Athens, Greece; director@hih.org.gr

<sup>13</sup> Ignetta Holographie (P) Ltd., Coimbatore 641105, India; processcolor@vsnl.com

<sup>14</sup> Physics Department, Louis Pasteur University, 67000 Strasbourg, France; michelgrosmann@mac.com

<sup>15</sup> Vavilov State Optical Institute, 199034 St. Petersburg, Russia; visland@mail.ru

<sup>16</sup> Ultimate Holography, 33000 Bordeaux, France; yves.gentet@ultimate-holography.com

<sup>17</sup> Physics Department, Moscow Polytechnic University, 107023 Moscow, Russia; kaser45@gmail.com

<sup>18</sup> Polytechnic Museum, 101000 Moscow, Russia; oftikhomirova@polytech.one

<sup>19</sup> Journal Photonics Russia, 125319 Moscow, Russia; natali.istomina@mail.ru

<sup>20</sup> Department of Laser Measuring and Navigation Systems, Saint Petersburg State Electrotechnical University “LETI”, 197022 St. Petersburg, Russia; vlad.venediktov@mail.ru

<sup>21</sup> Department of General Physics, Saint Petersburg State University, 199034 St. Petersburg, Russia

\* Correspondence: mshishova@bmstu.ru (M.V.S.); n.petrov@niuitmo.ru (N.V.P.)

In preparing the tribute paper, we collected a large archive of photographs with S. Odinokov and many famous Russian holographists. We decided to place it as supporting materials. We believe that this chronicle is an important touch in the Russian holography.

### Photos from the Scientific events

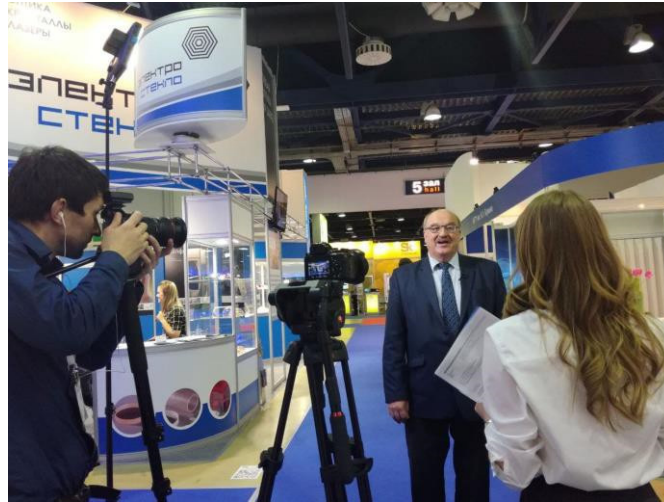

Sergey Odinokov gives an interview at the Photonics 2017 exhibition, Moscow, February 28, 2017

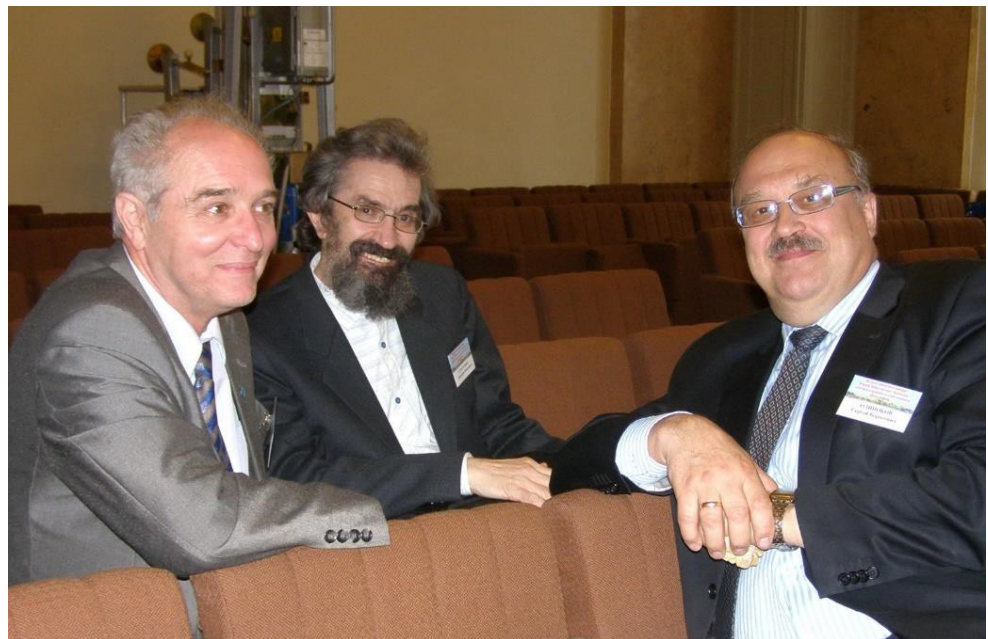

All-Russian seminar “Yuri Denisyuk — the founder of Russian holography”, St. Petersburg, Ioffe Institute, May 2007. In the photo, from left to right: V. M. Arpishkin, D. I. Staselko, S. B. Odinokov

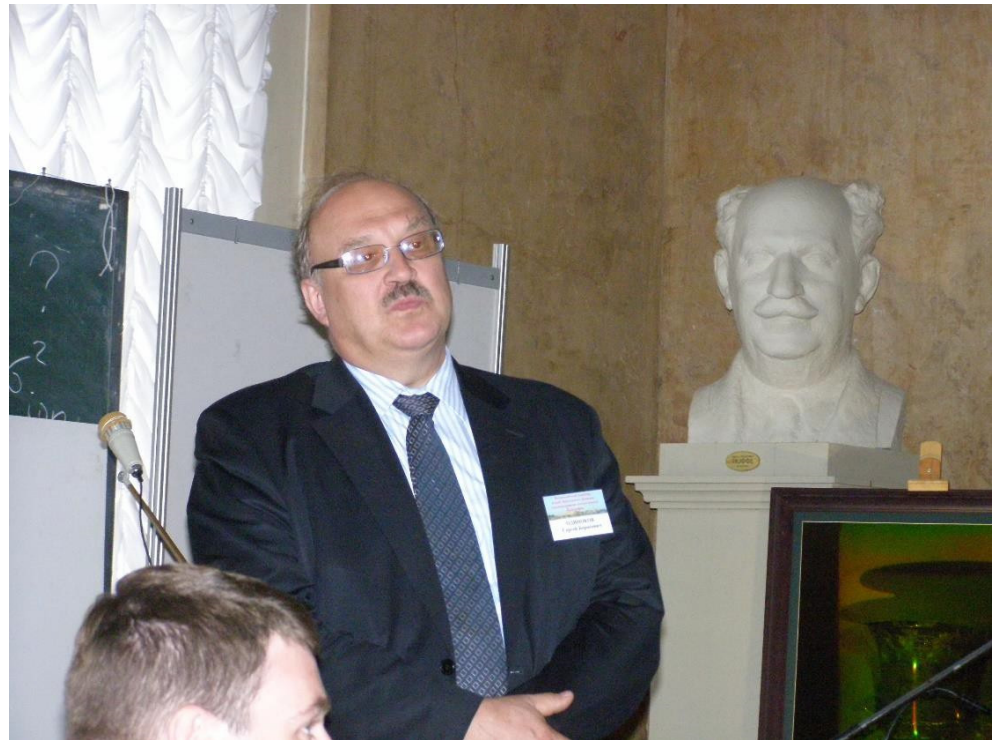

All-Russian seminar “Yuri N. Denisyuk — the founder of Russian holography”, St. Petersburg, Ioffe Institute, May 2007.  
Section lead Sergey Odinokov

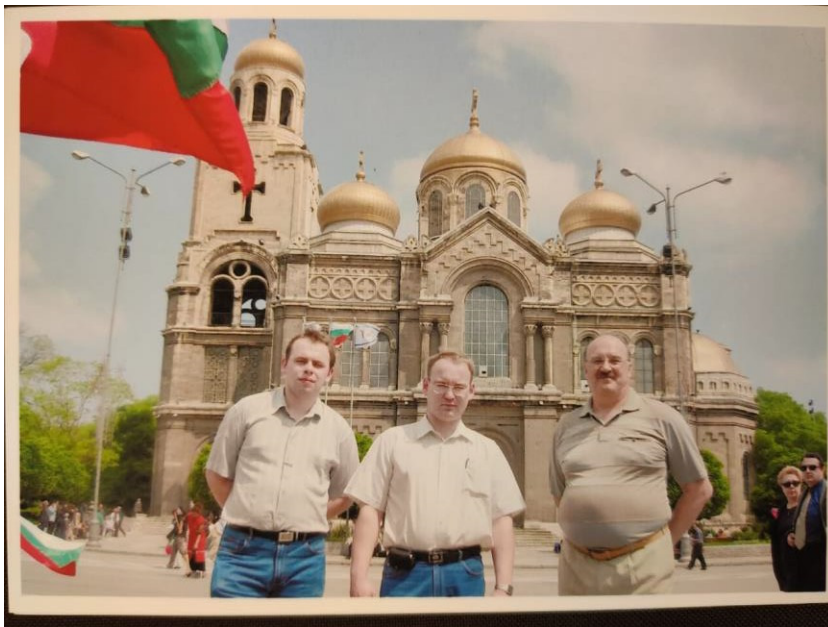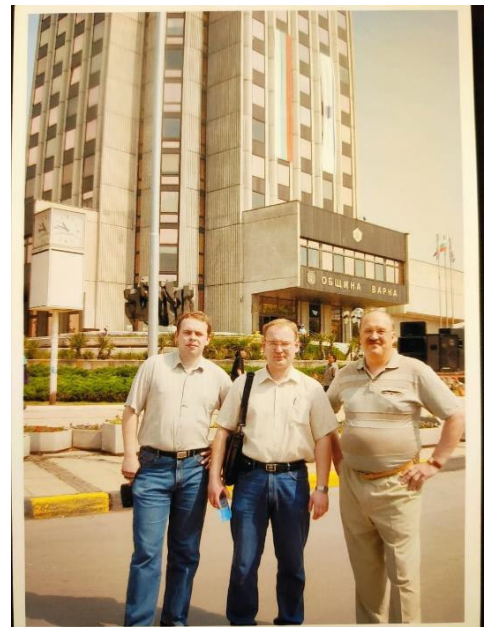

In both pictures from left to right: Dminrii Lushnikov, Ivan Tsyganov, Saints Constantine and Helena, during the Conference Holography, Varna, Bulgaria, 2005



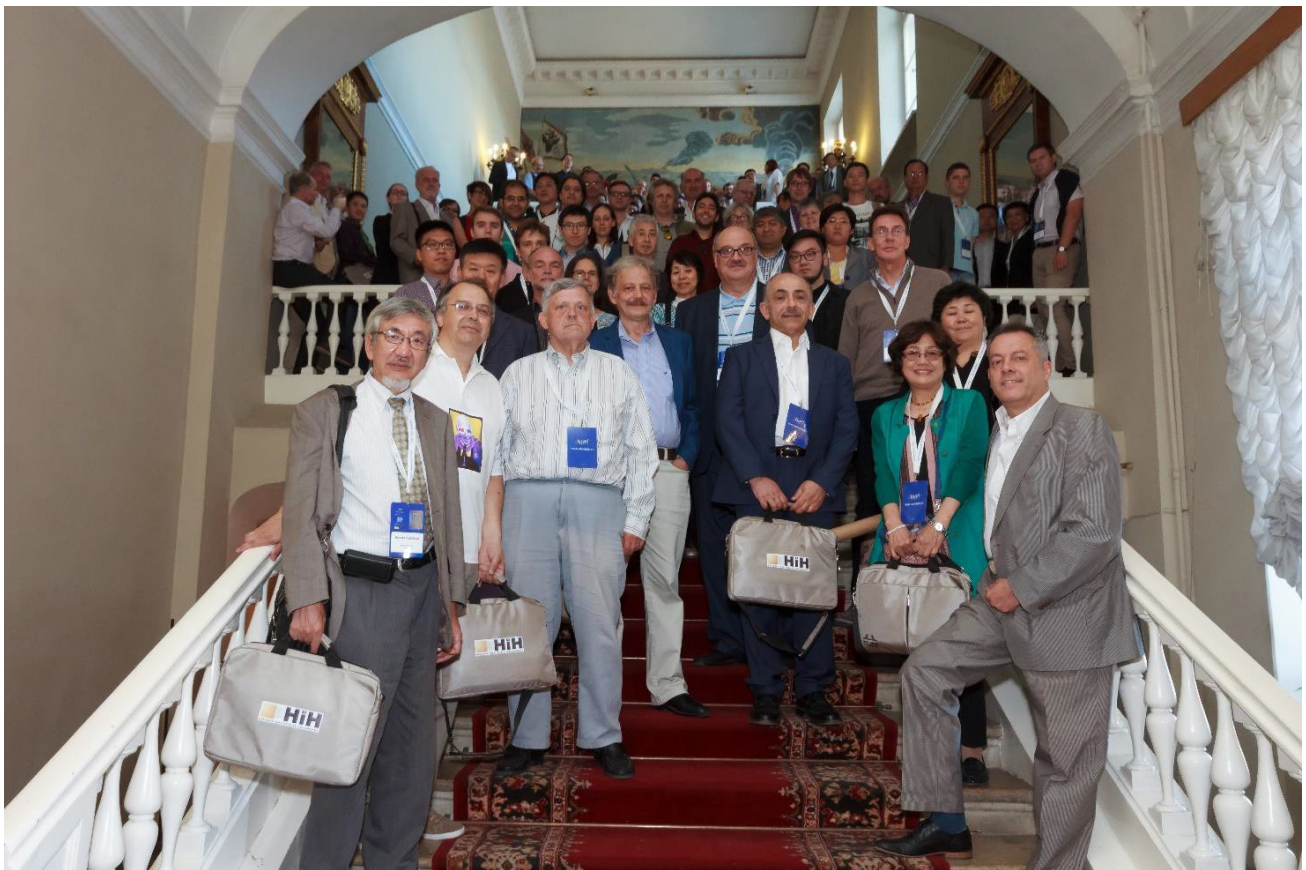

Group photo at the 10th International Symposium on Display Holography, St. Petersburg, 2015

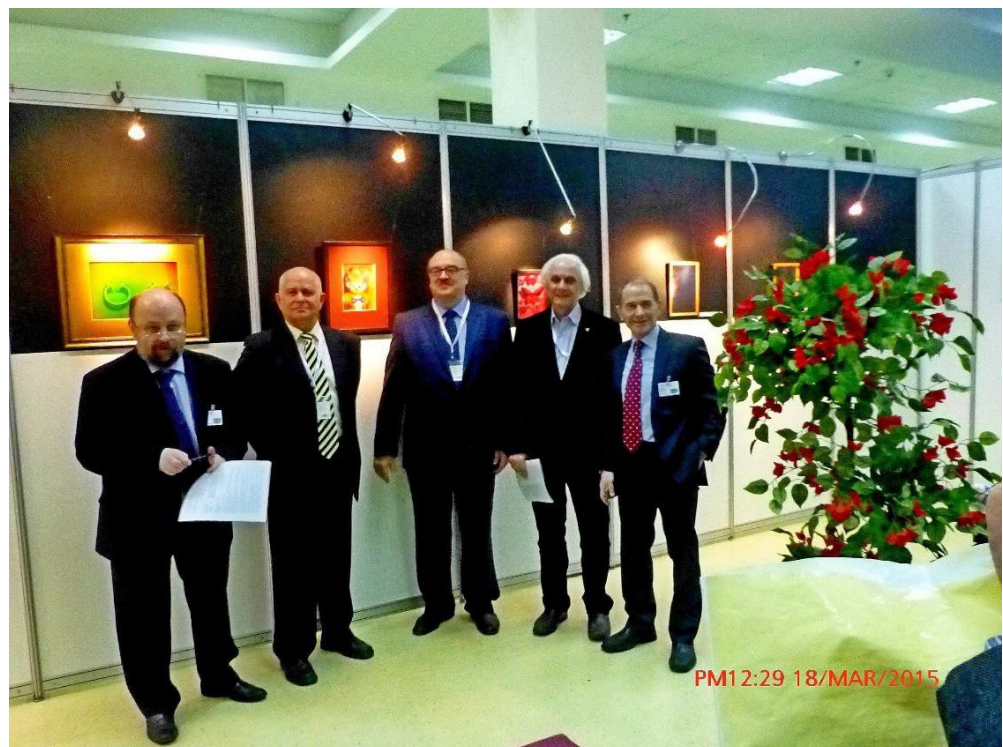

Photonics 2015 exhibition, Moscow, March 18, 2015. In the photo from left to right: V. Venediktov, A. Smyk, S. Odinokov, A. Polishchuk, M. Shevtsov



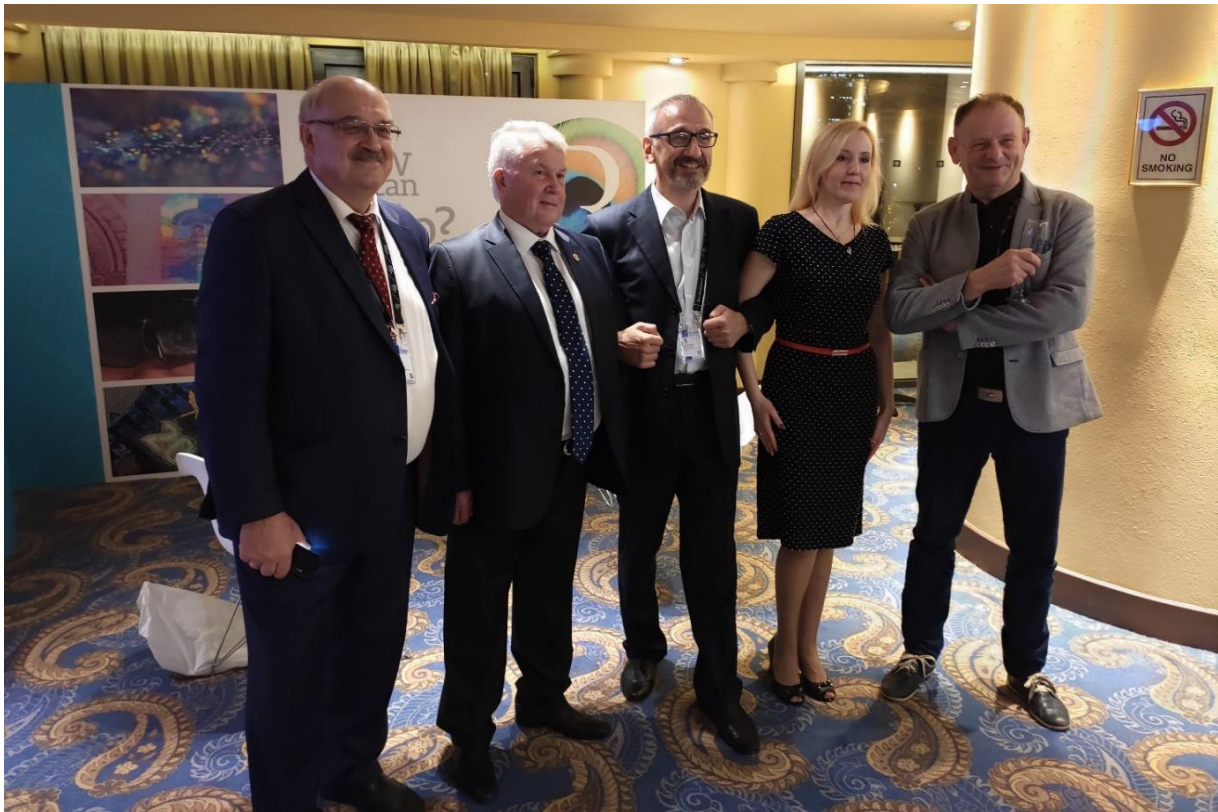

In the photo from left to right: Sergey B. Odinokov, Leonid V. Tanin, Chermen B. Kaytukov, Elena N. Tanina, Roman Stachowiak, during the Holography Conference, Athens, Greece

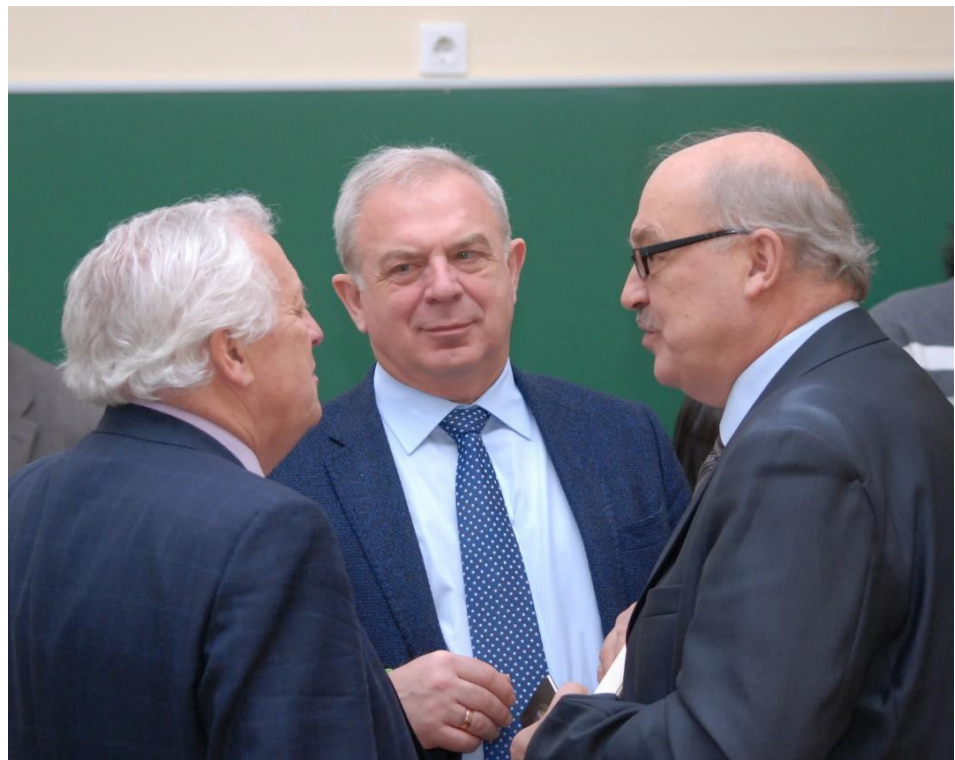

At the V International Conference "Photonics and Information Optics" (2016). In the photo from left to right: Academician Vitaly I. Konov, Nikolay N. Evtikhiev, and Sergey B. Odinokov

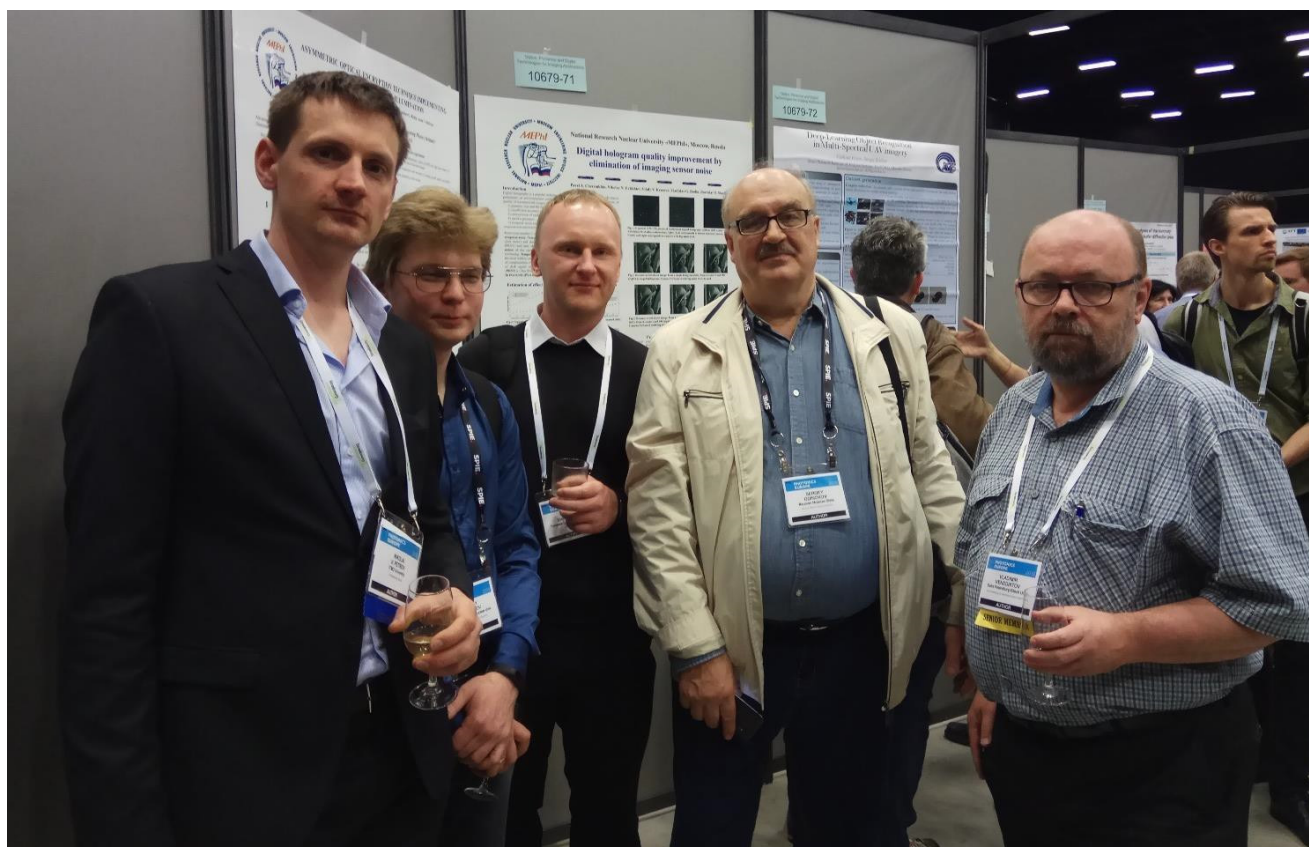

SPIE Photonics Europe 2018. In the photo from left to right: Nikolay V. Petrov, Vitaly V. Krasnov, Igor A. Shevuunov, Sergey B. Odinokov, and V. Yu. Venediktov

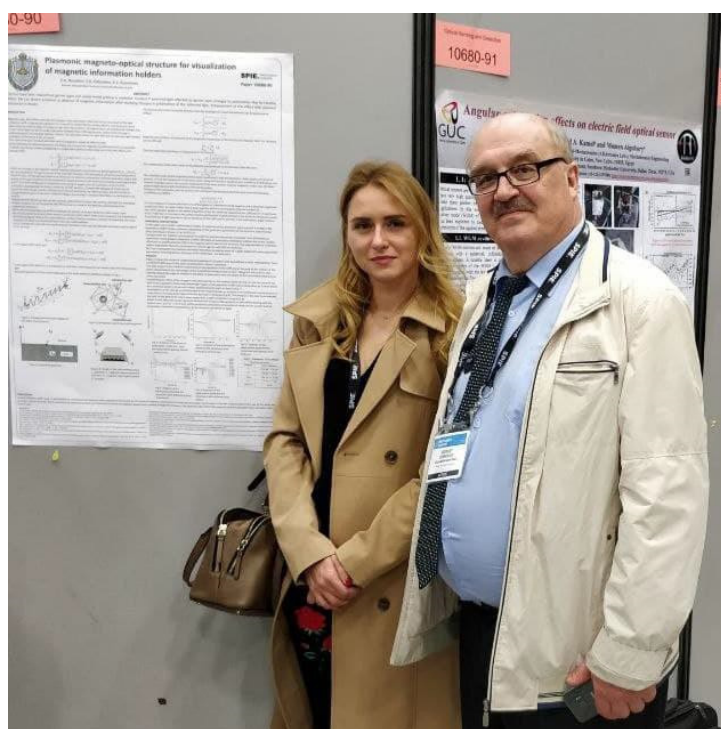

Yanina Grad and Sergey Odinokov during the conference SPIE Photonics Europe, Strasbourg, France, 2018

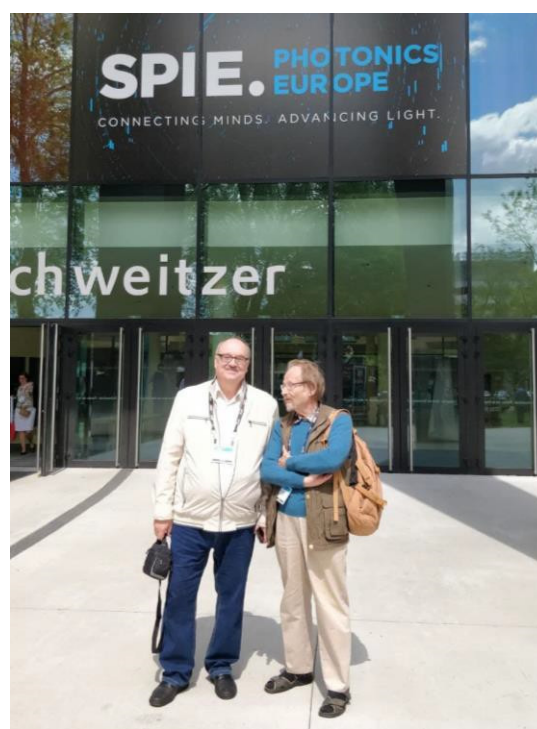

S. B. Odinokov and M. H. Grosmann during the SPIE Photonics Europe, Strasbourg, France, 2018



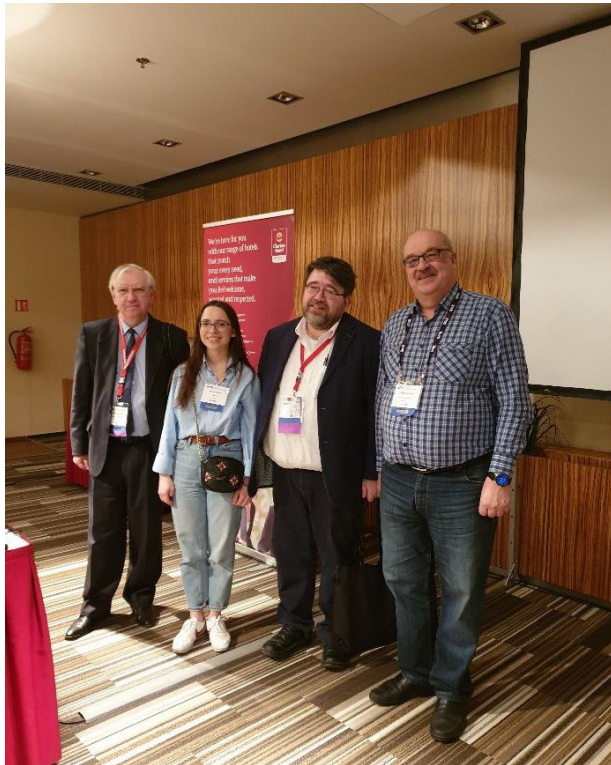

From left to right: Miroslav Hrabovský, Maria Shishova, John T. Sheridan, Sergey Odínokov, SPIE Optics + Optoelectronics 2019, Prague, Czech Republic, April 4, 2019

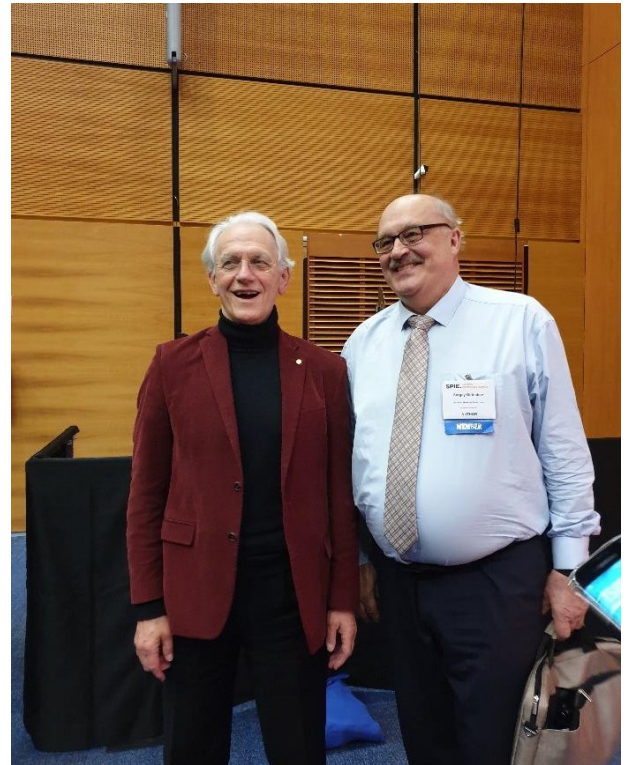

Gérard Mourou and Sergey Odínokov after the plenary talk of Gérard Mourou, April 3, 2019

### Memories from HOLOEXPO Conferences

The photo collection provided by HOLOEXPO organizing committee.

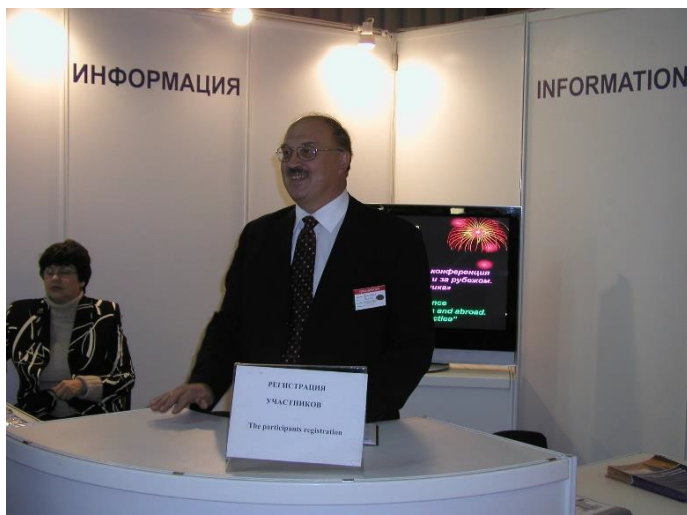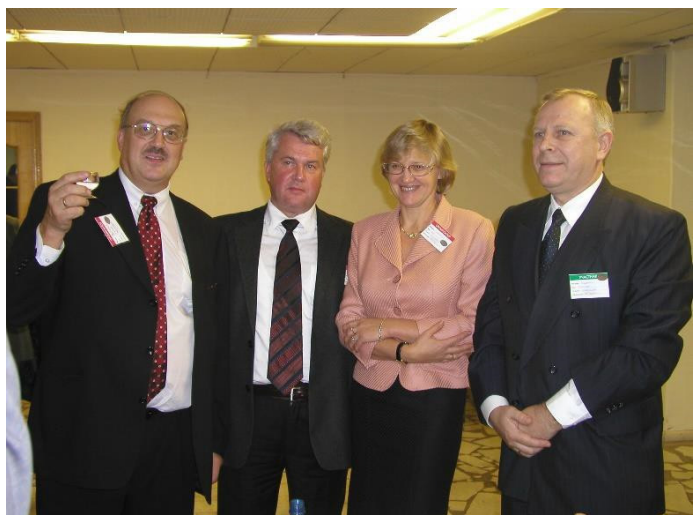

Conference HOLOEXPO 2004, Moscow, Russia. On the right photo from left to right: S. B. Odínokov, L. V. Tanin, E. N. Bogachevskaya, and A. I. Chepurnoy

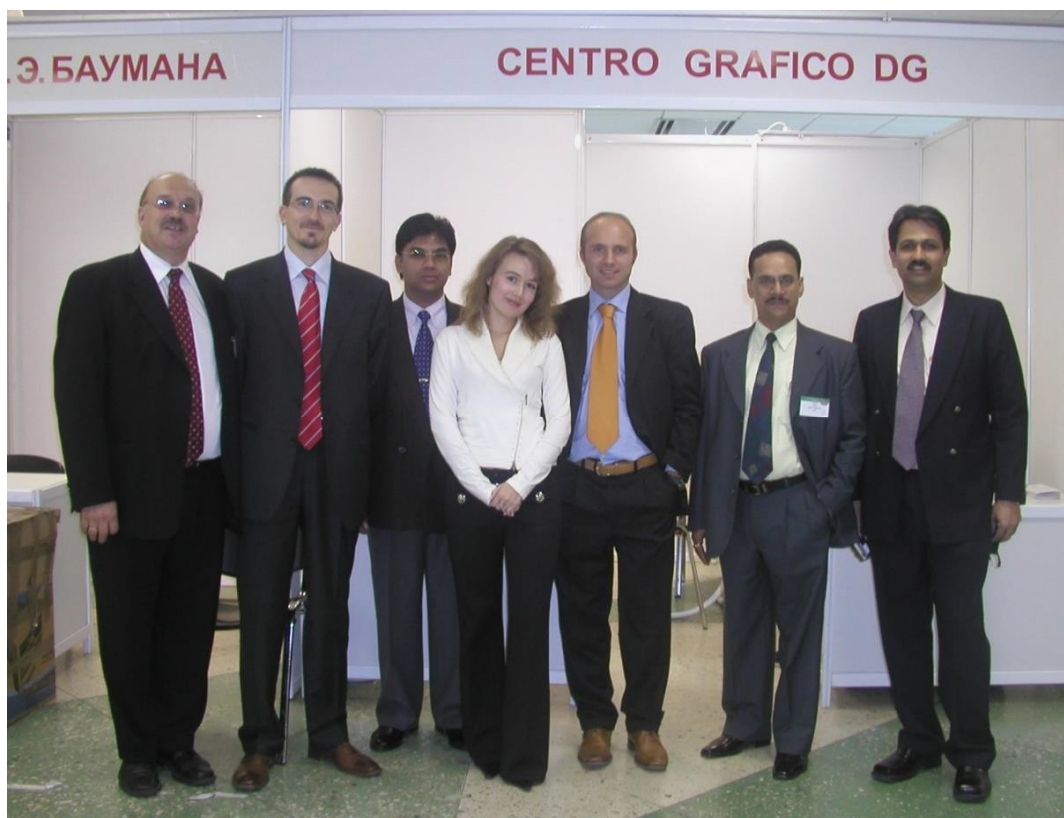

Conference HOLOEXPO 2005, Moscow, Russia. From left to right: S. B. Odinokov, Luca Radiche (Italy), third from the right Simone Foini (Italy), at the center Maria Panina (translator), others are colleagues from Garware Polyester Ltd. (India)

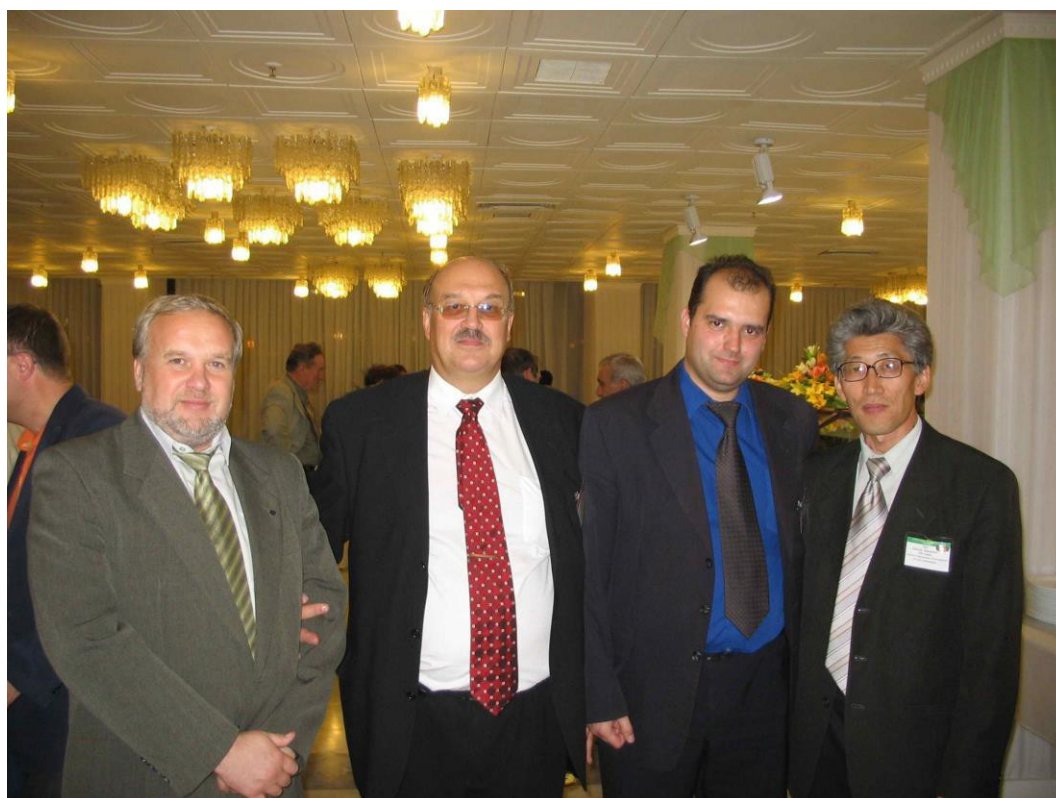

Conference HOLOEXPO 2006, Moscow, Russia. From left to right: B. Akimov, S. Odinokov, A. Nikolaev, E. F. Pen



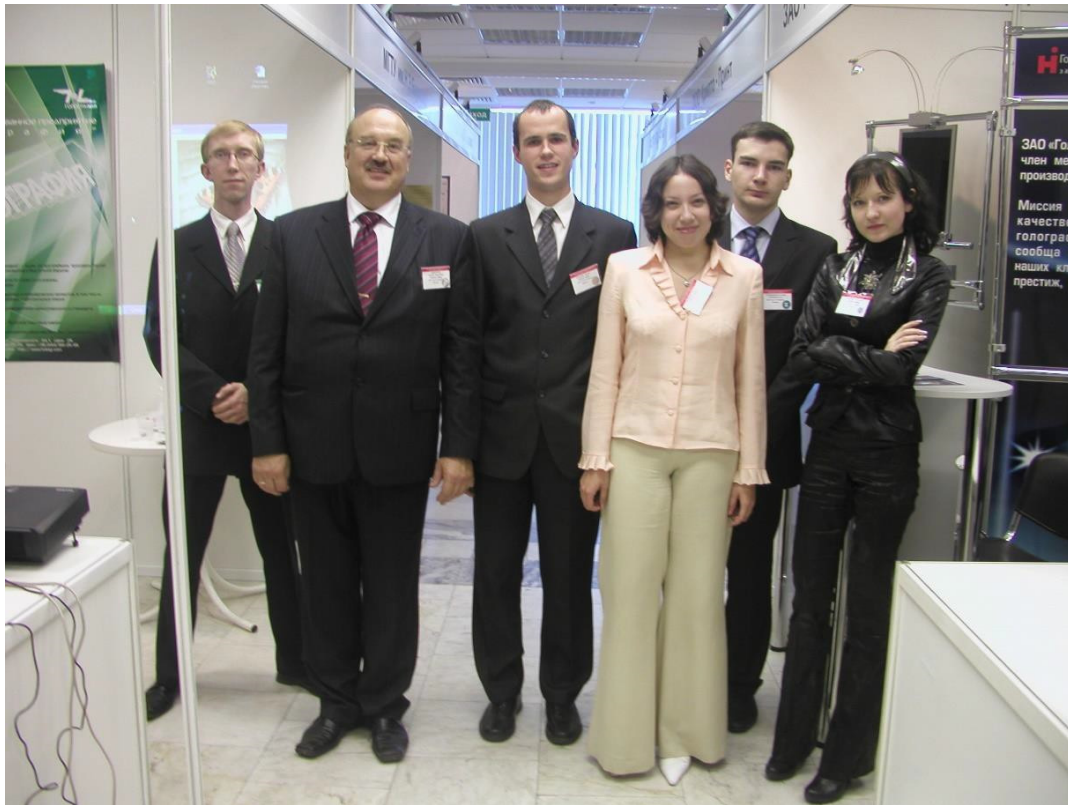

Conference HOLOEXPO 2007, Moscow, Russia. From left to right: A. Kuznetsov, S. Odinokov, M. Kovalev, A. Suvorina, A. Solomashenko, N. Yakovleva

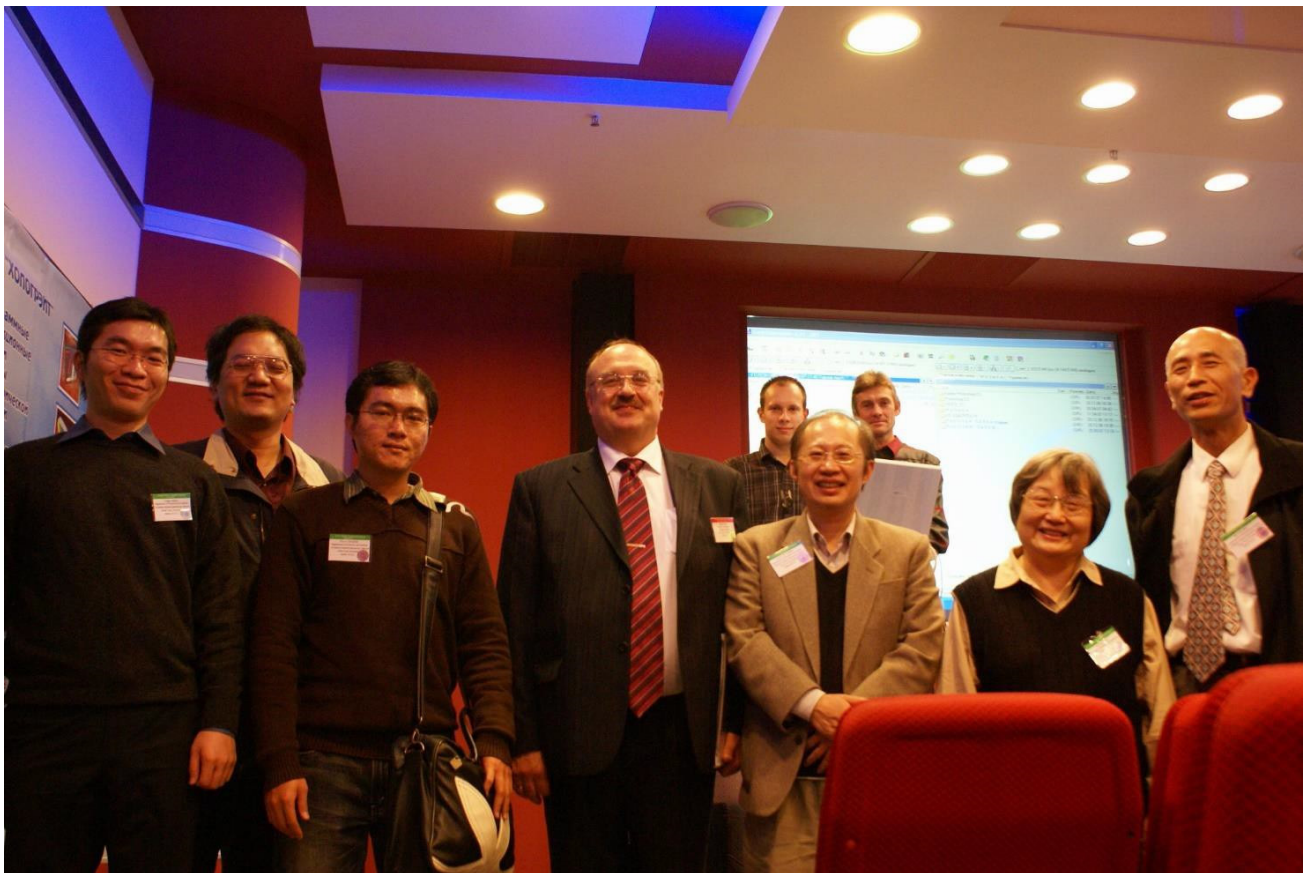

Conference HOLOEXPO 2007, Moscow, Russia. S. B. Odinokov with Prof. C. J. Cheng and Taiwan colleagues

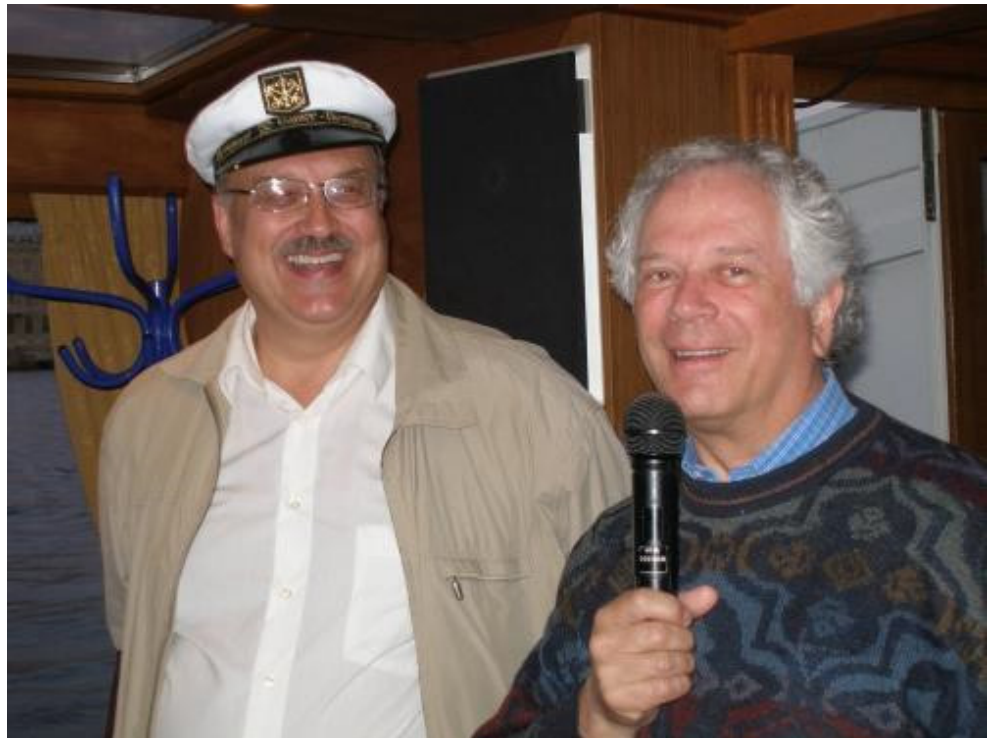

Conference HOLOEXPO 2008, Saint-Petersburg, Russia. Sergey Odinokov and Ian Lancaster.

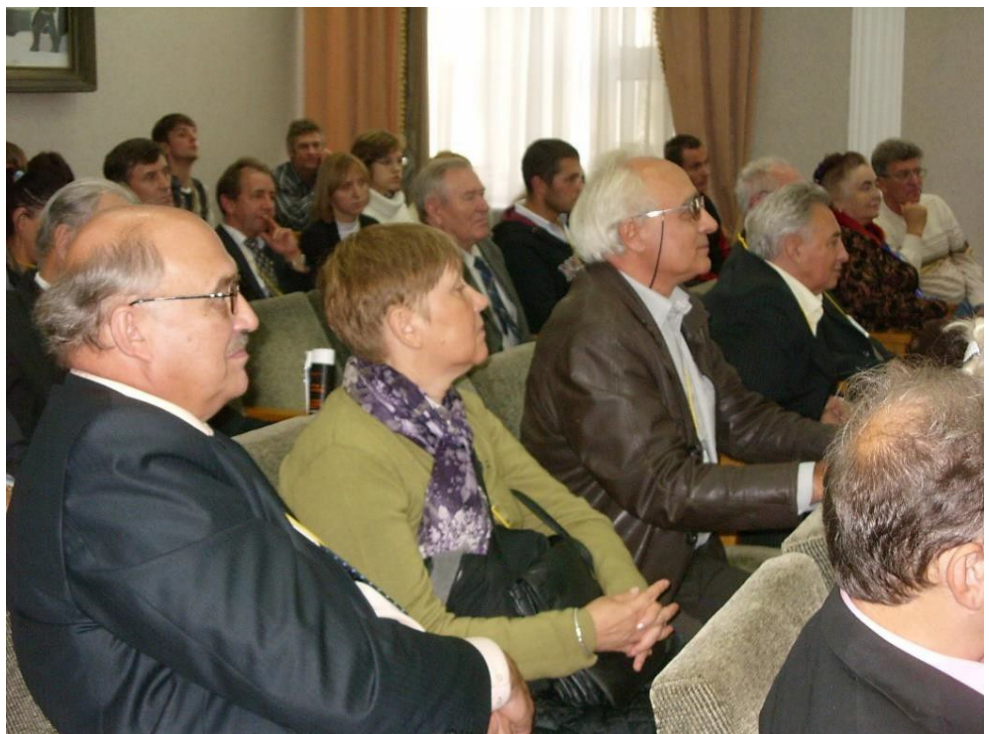

Conference HOLOEXPO 2008, St. Petersburg, Russia. In the photo, from left to right: Sergey Odinokov, Elena Stoykova, Ventseslav Sainov, Georgy Semyonov



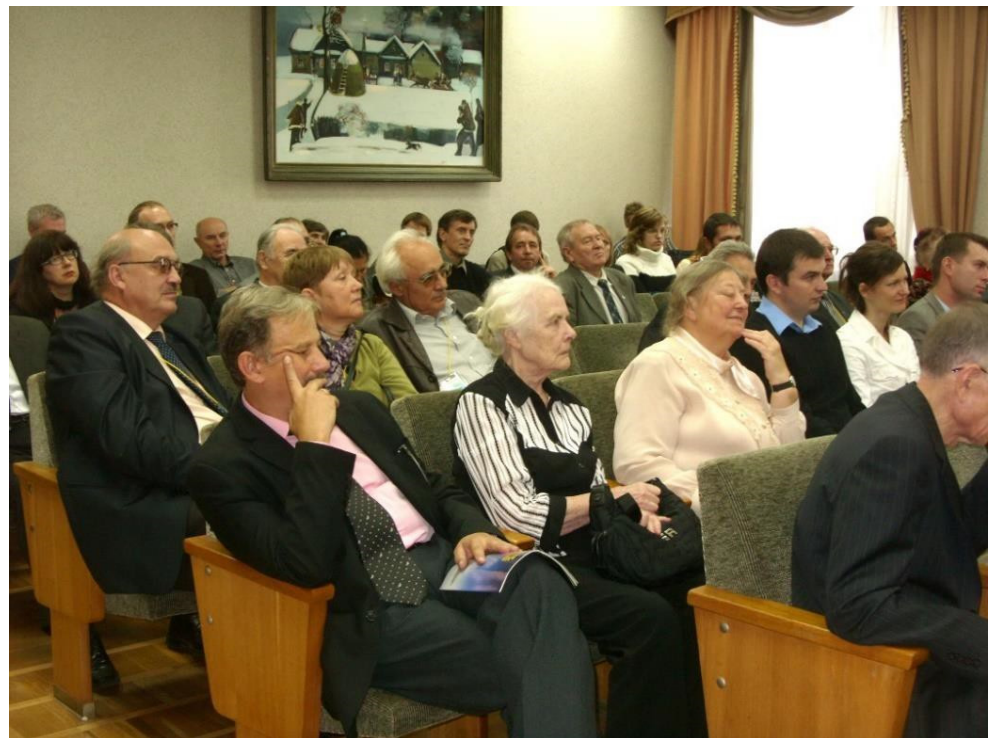

Conference HOLOEXPO 2008, St. Petersburg, Russia. In the photo, third row from left to right: S. Odinokov, E. Stoykova, V. Sainov. Second row (rearer) from left to right: A. Sarakinos, G.V.Ostrovskaya, G. V. Dreiden.

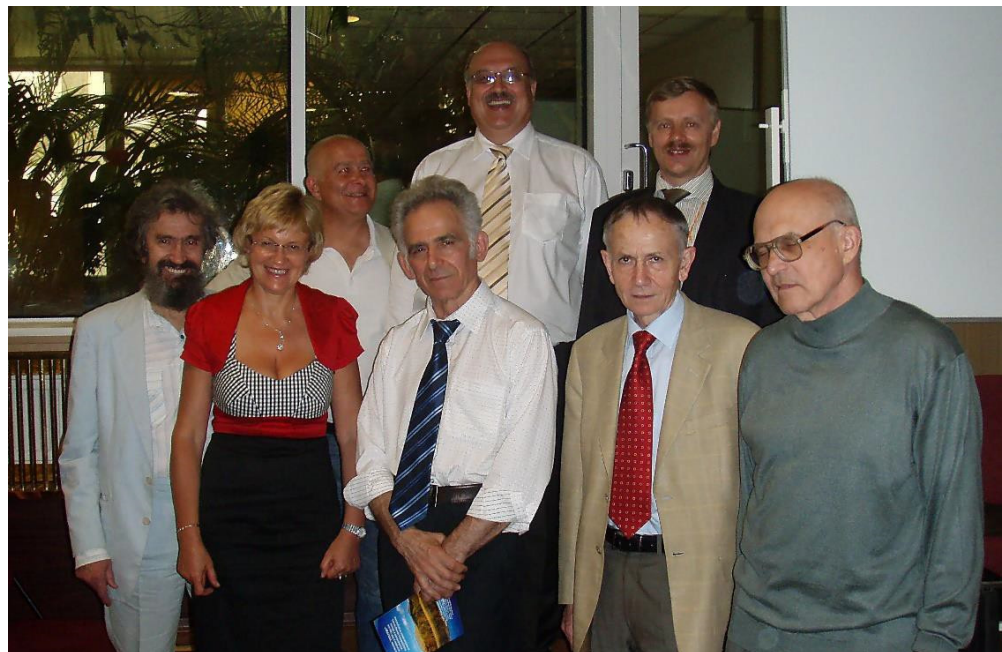

Conference HOLOEXPO 2008, St. Petersburg, Russia. In the background from left to right: A. Smyk, S. Odinokov, N. Kazanskiy. In the front row: D. Staselko, E. Bogachevskaya, A. Tverdokhle, V. Vanin, N. Vlasov.

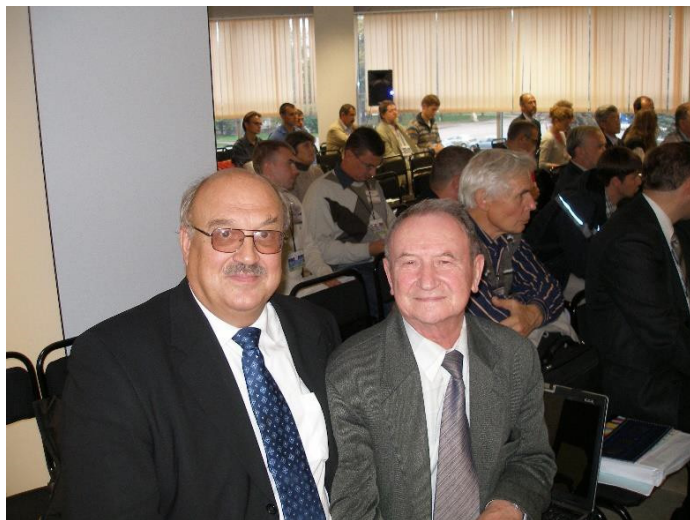

S. B. Odinokov and A. V. Lukin, conference HOLOEXPO 2010, Moscow, Russia.

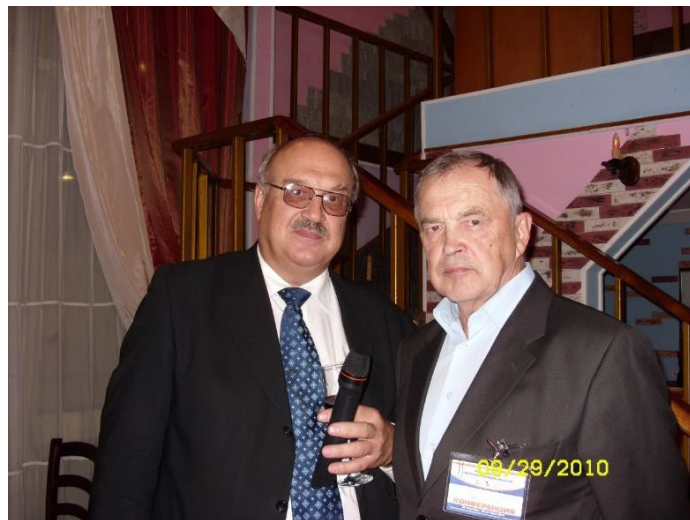

S. B. Odinokov and G. A. Gavrilov, conference HOLOEXPO 2010, Moscow, Russia.

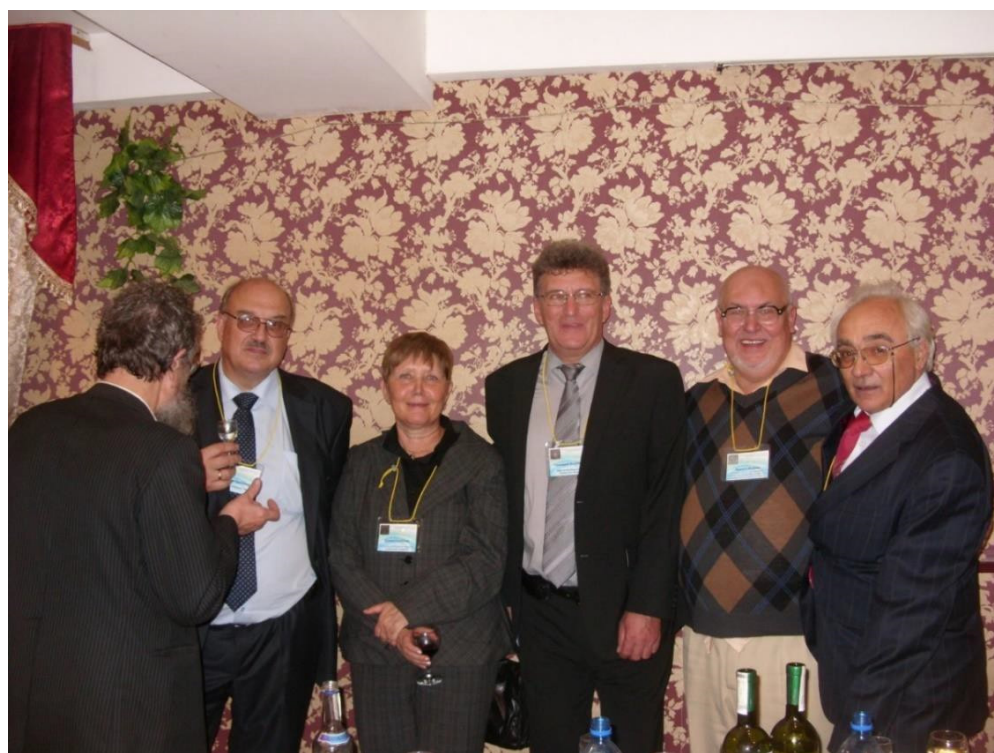

Conference HOLOEXPO 2011, Minsk, Belarus. From left to right: D. Staselko (standing with his back to the camera), S. Odinokov, E. Stoykova, G. Vishnyakov, Unknown, V. Sainov



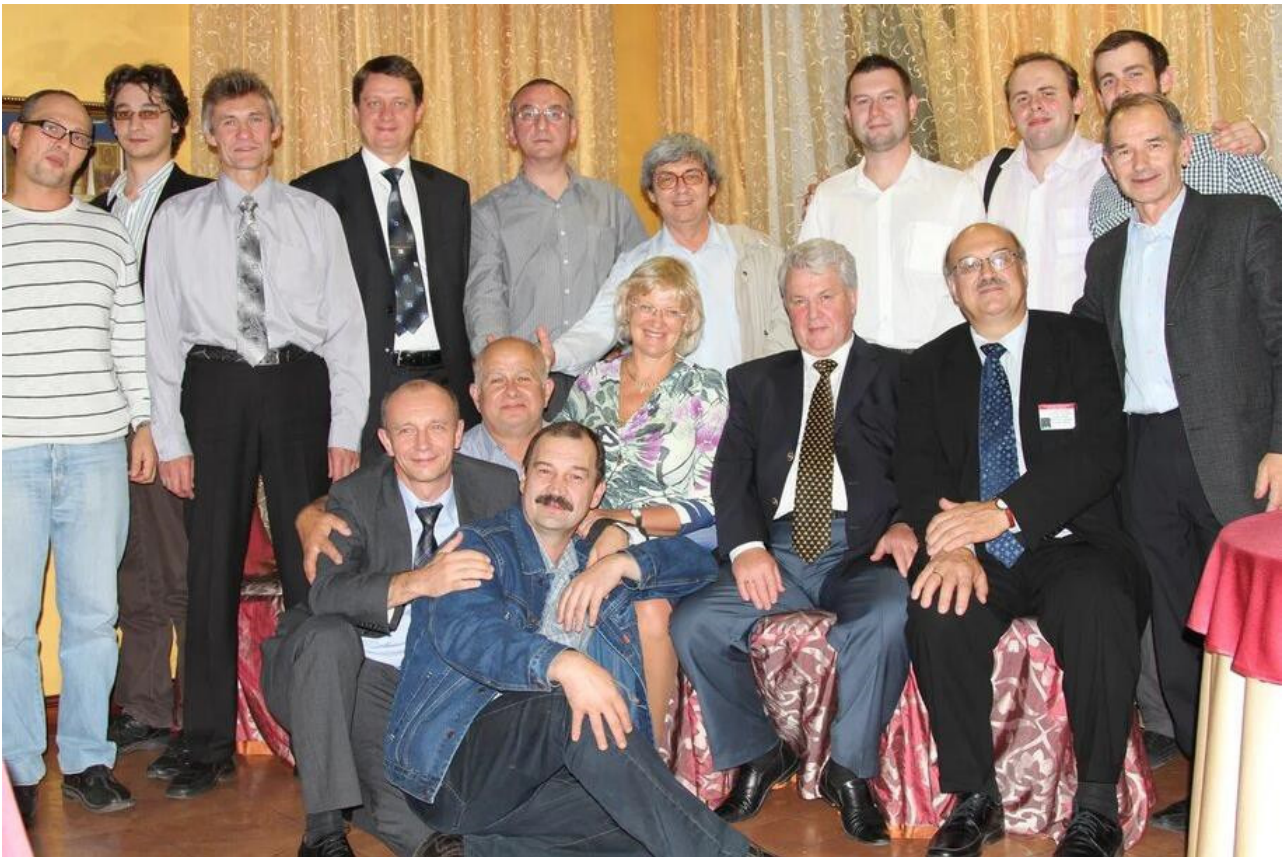

Group photo at the conference HOLOEXPO 2012, Suzdal, Russia

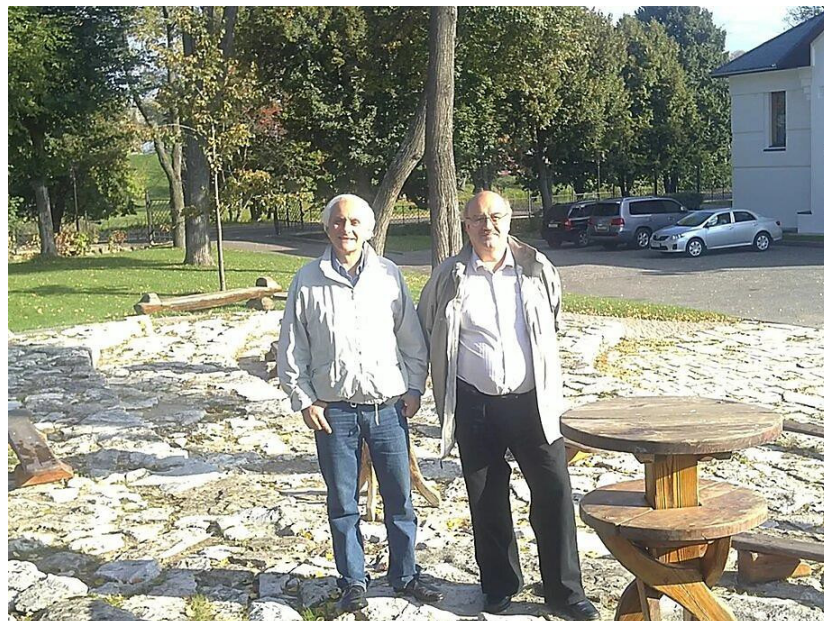

A.G. Polishchuk and S. B. Odínokov at the conference HOLOEXPO 2012, Suzdal, Russia

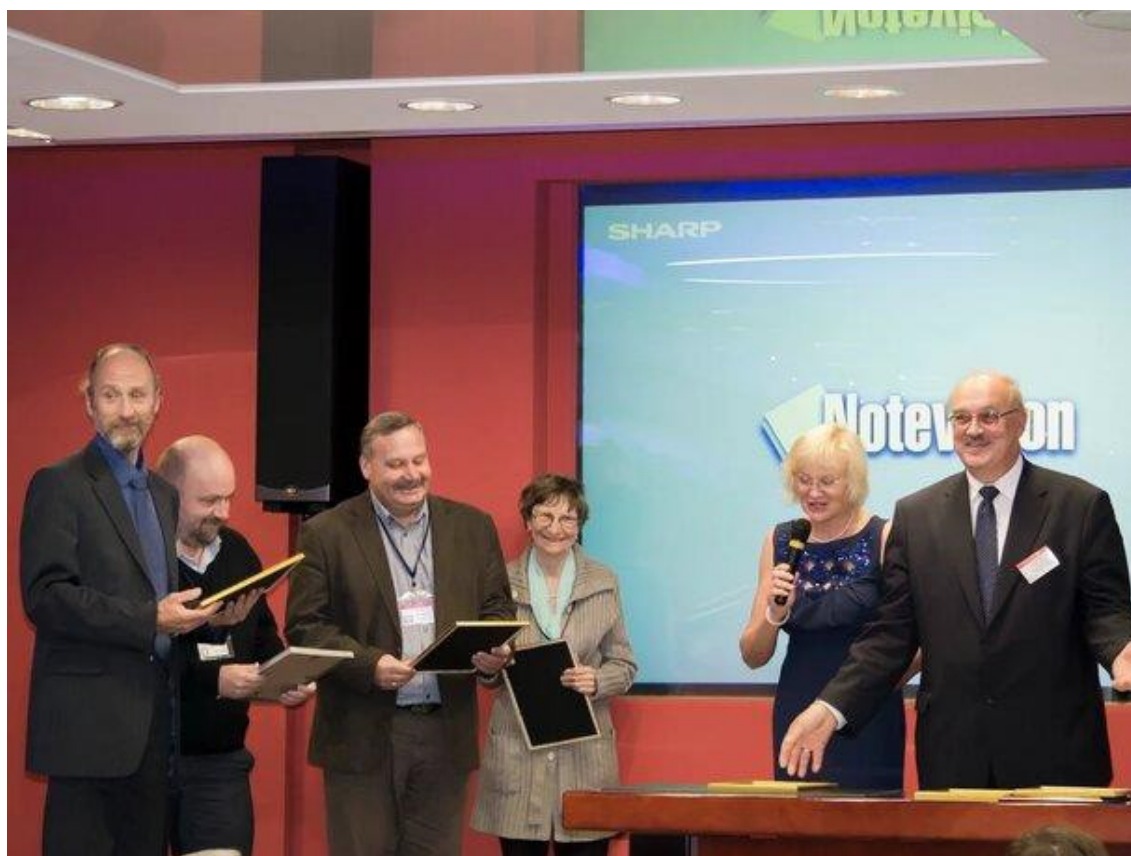

Conference HOLOEXPO 2013, Moscow, Russia. From left to right: A. Pavlov, V. Venediktov, S. Koreshev, O. Andreeva, E. Bogachevskaya, S. Odinokov

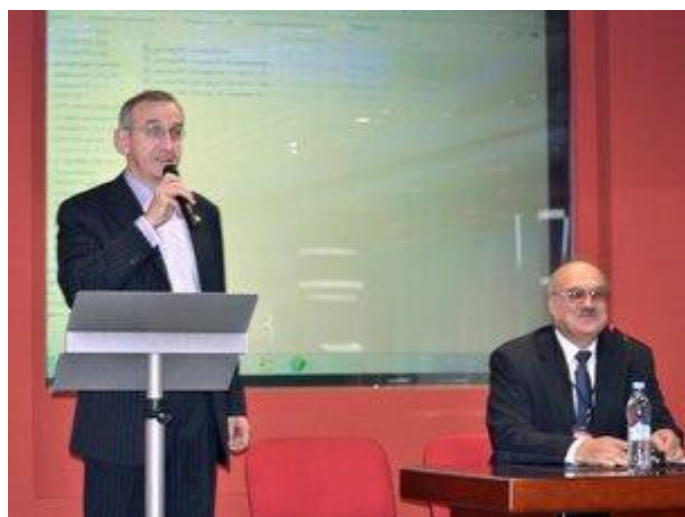

C. B. Kaytukov and S. B. Odinokov, conference HOLOEXPO 2013, Moscow, Russia

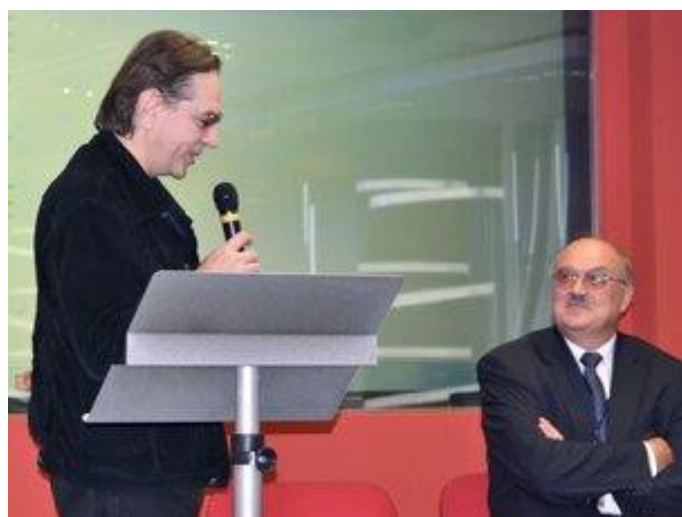

S. Zacharovas and S. Odinokov, conference HOLOEXPO 2013, Moscow, Russia



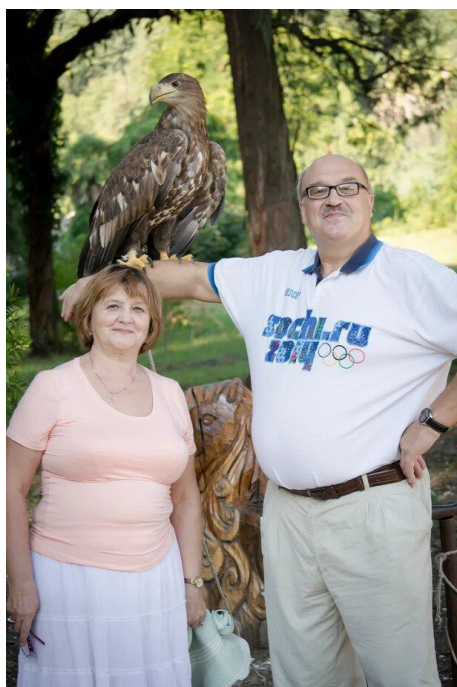

Conference HOLOEXPO 2014, Sochi, Russia. O. Odinkova and S. Odinkov

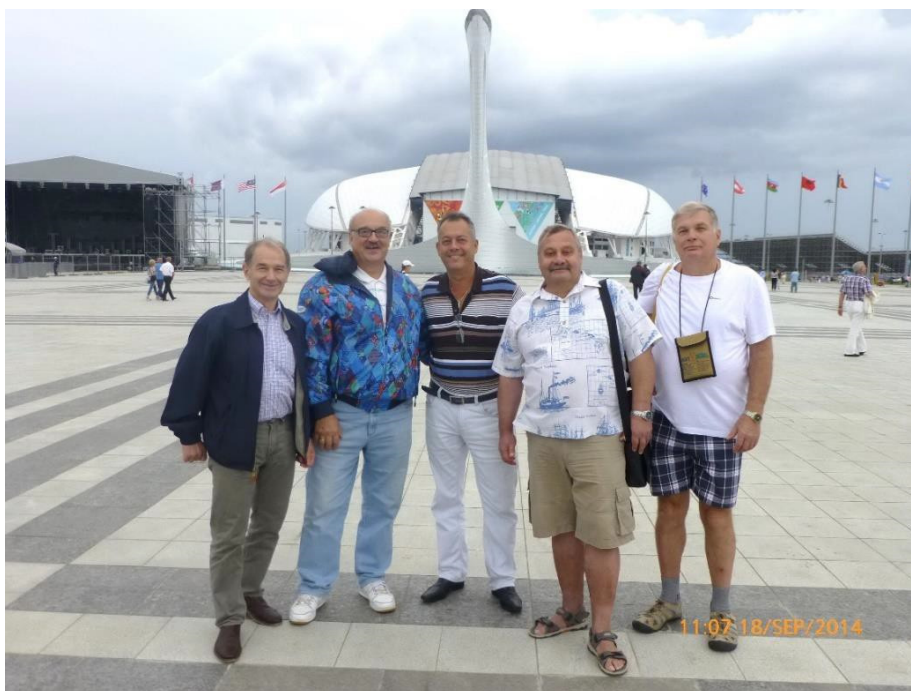

Conference HOLOEXPO 2014, Sochi, Russia. In the photo, from left to right: M. Shevtsov, S. Odinkov, A. Lembessis, S. Koreshev, A. Yanovsky

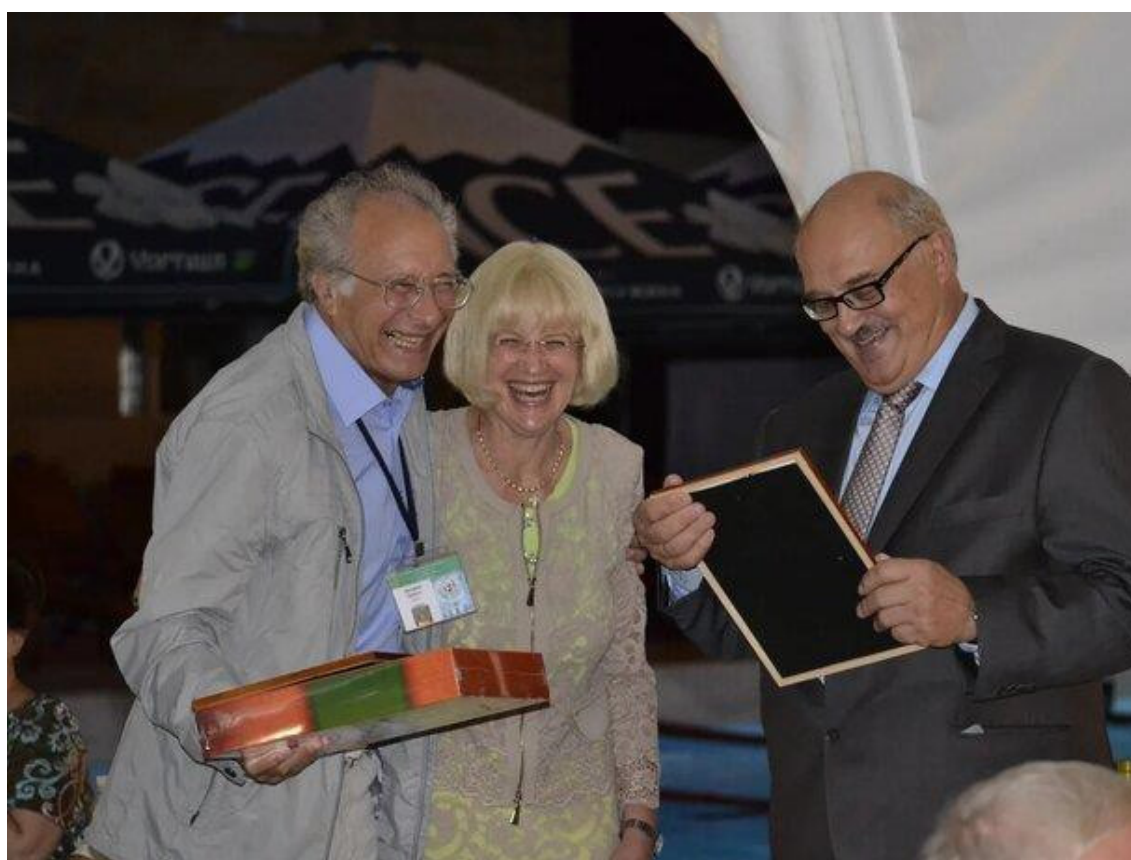

Conference HOLOEXPO 2014, Sochi, Russia. G. I. Greisukh, E. N. Bogachevskaya, and S. B. Odinkov

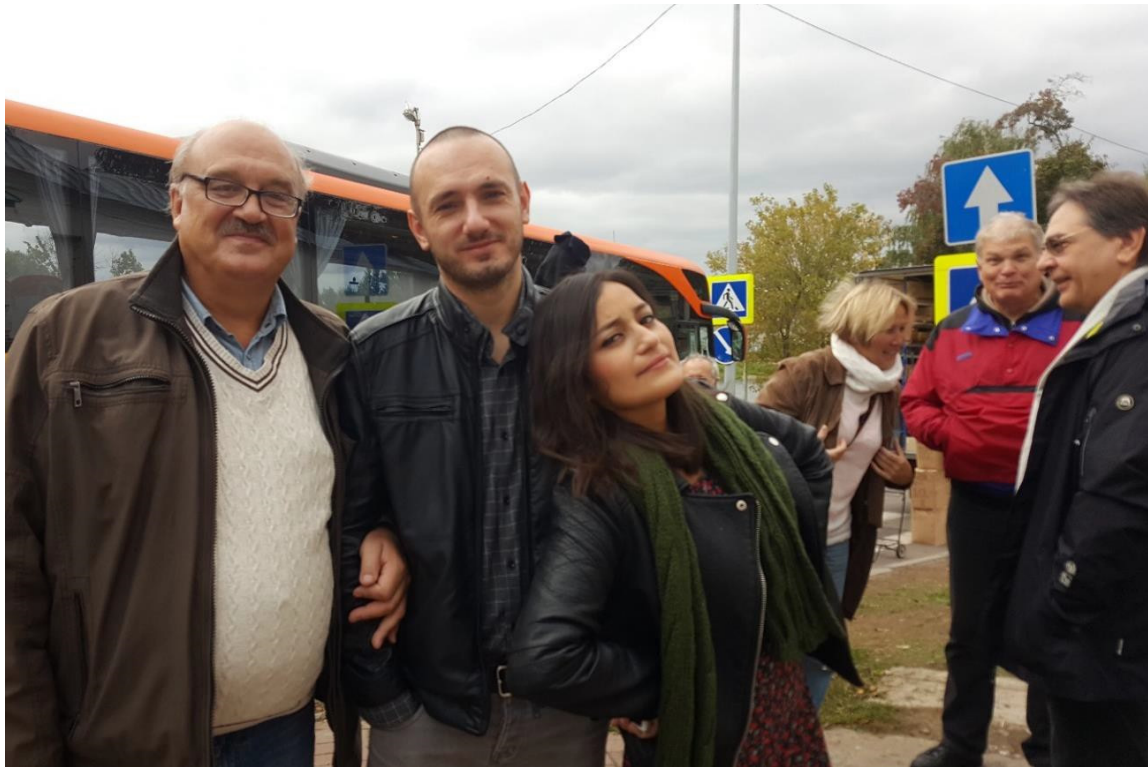

Conference HOLOEXPO 2015, Yaroslavl, Russia. From left to right: Sergey Odinokov, Michael Sidorov, Fernanda Gabriel, Tatiana Balueva, Alexey Yanovsky, and Stanislovas Zacharovas

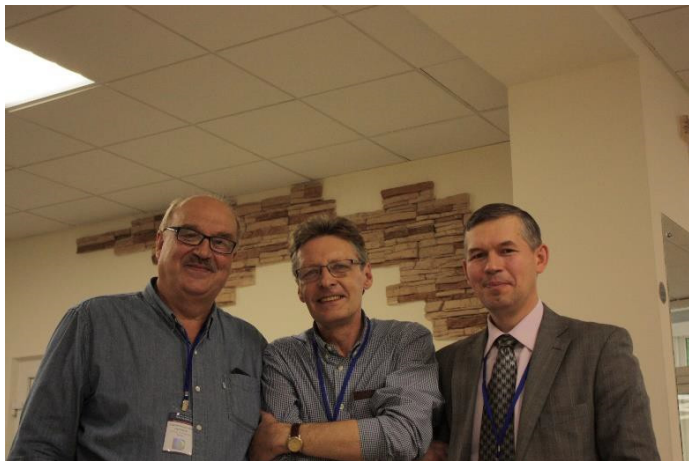

S. Odinokov, V. Sotnikov, and A. Melnikov, conference HOLOEXPO 2018, Zvenigorod, Russia

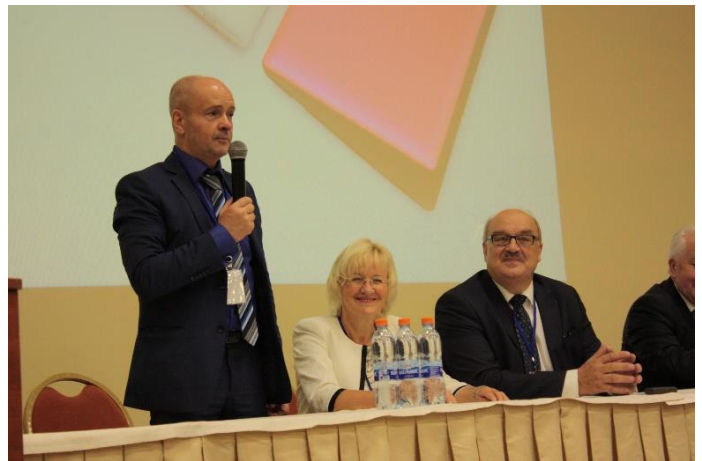

A. Lisovsky, E. Bogachevskaya, S. Odinokov, conference HOLOEXPO 2017, Zvenigorod, Russia



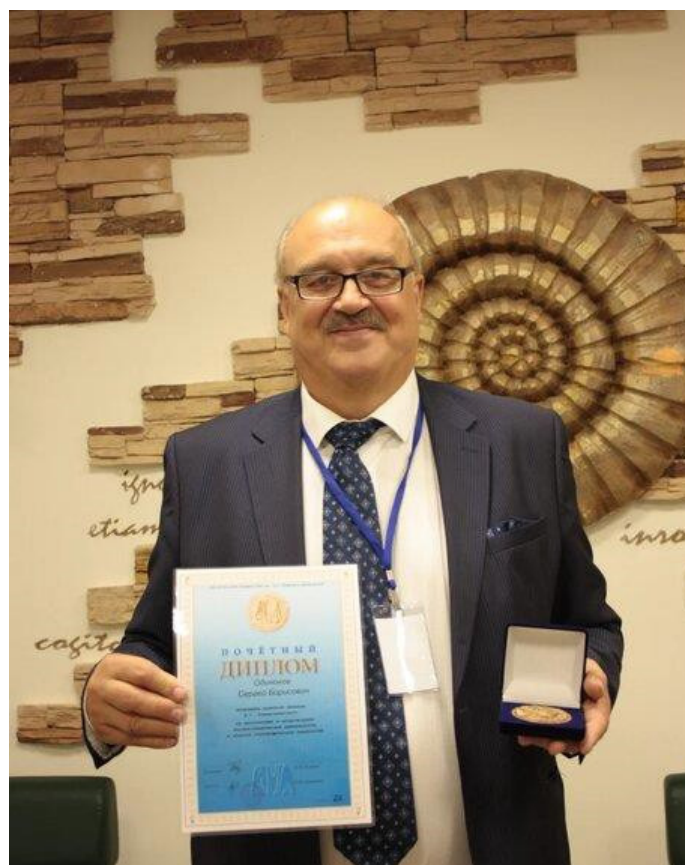

S. B. Odínokov with his Rozhdestvensky Medal, conference HOLOEXPO 2017, Zvenigorod, Russia

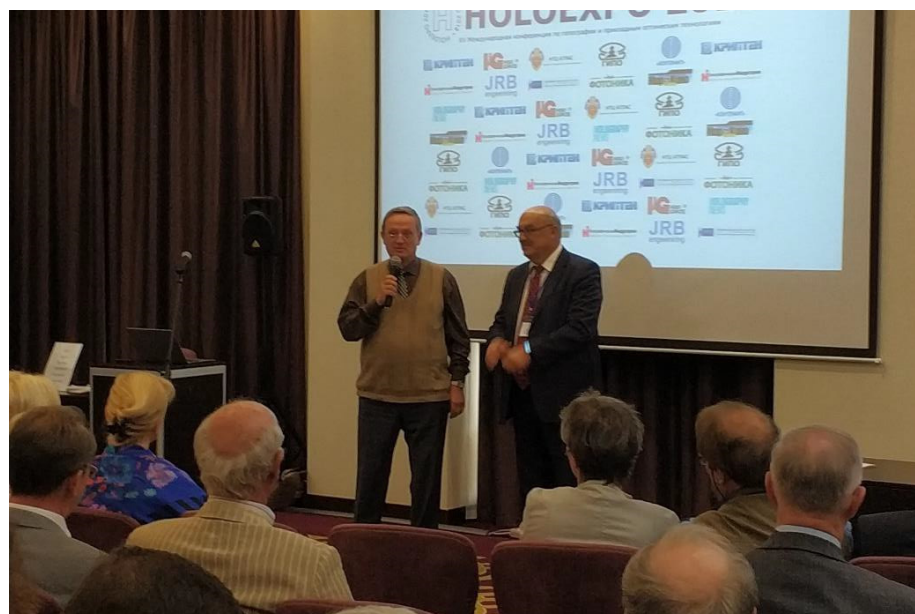

Sergey A. Shoidin and Sergey B. Odínokov, conference HOLOEXPO 2018, Nizhny Novgorod, Russia

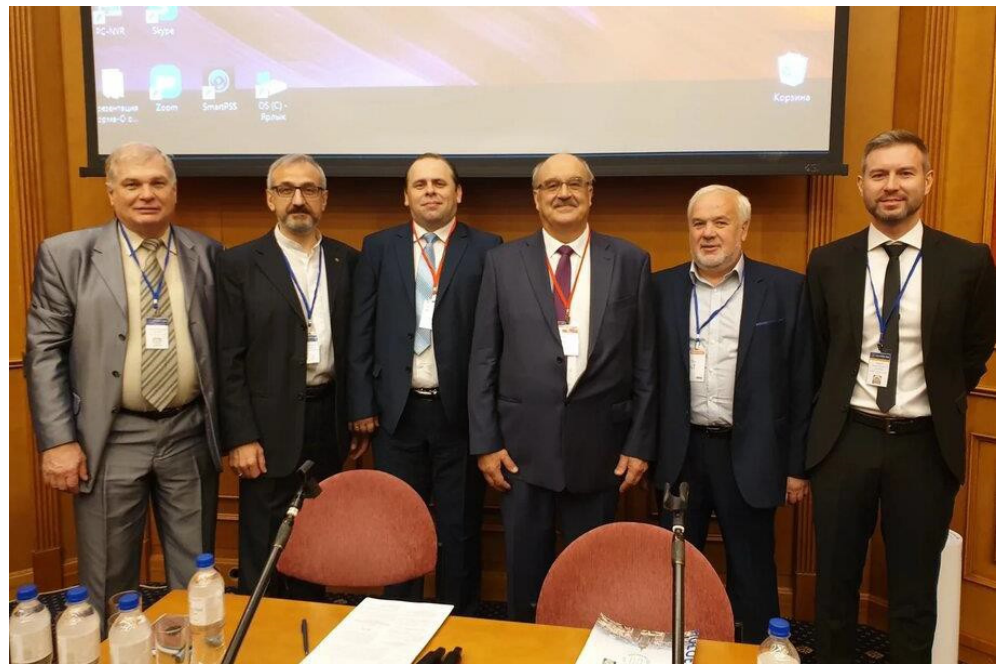

Conference HOLOEXPO 2013, Moscow, Russia. From left to right: A. Yanovsky, C. Kaytukov, D. Lushnikov, S. Odinokov, B. Akimov, and A. Smirnov



### Odinokov's team

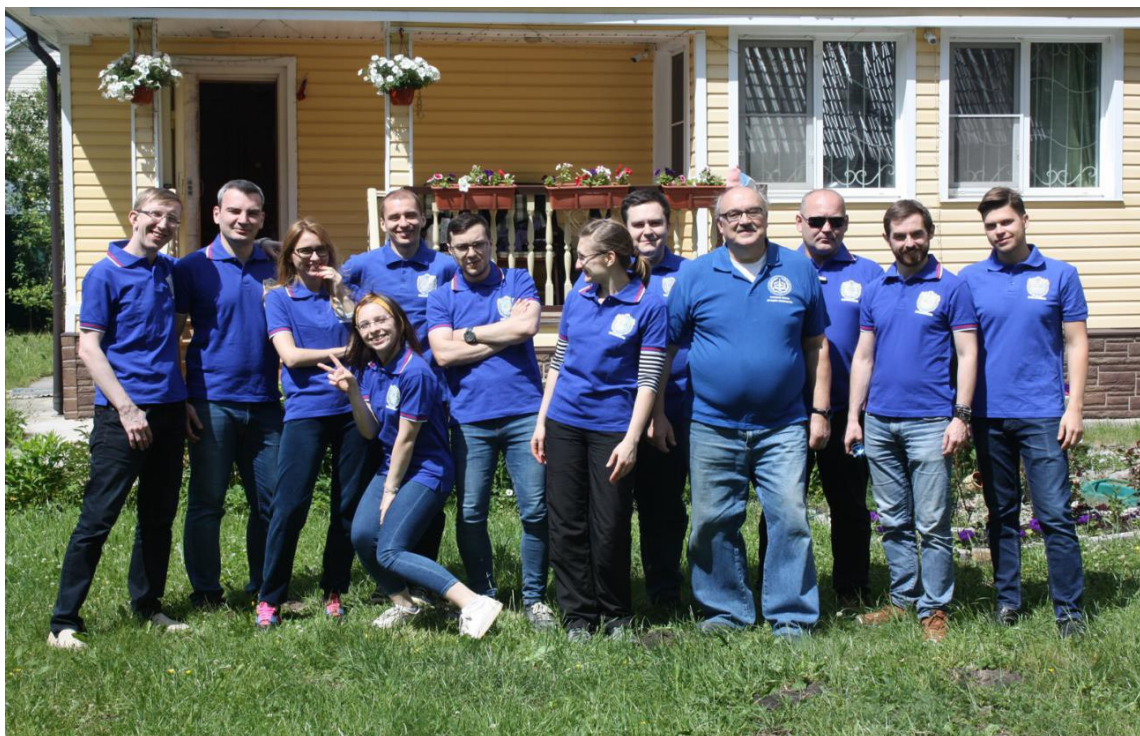

Celebrating the birthday of the laboratory in the country house of Sergei Borisovich. From June 9, 2018. From left to right: A. Kuznetsov, A. Solomashenko, Y. Grad, M. Shishova, S. Donchenko, N. Pirutin, E. Drozdova, V. Nikolaev, S. Odinokov, I. Tsyganov, A. Zherdev, V. Koluchkin.

### Memories from scientific trips

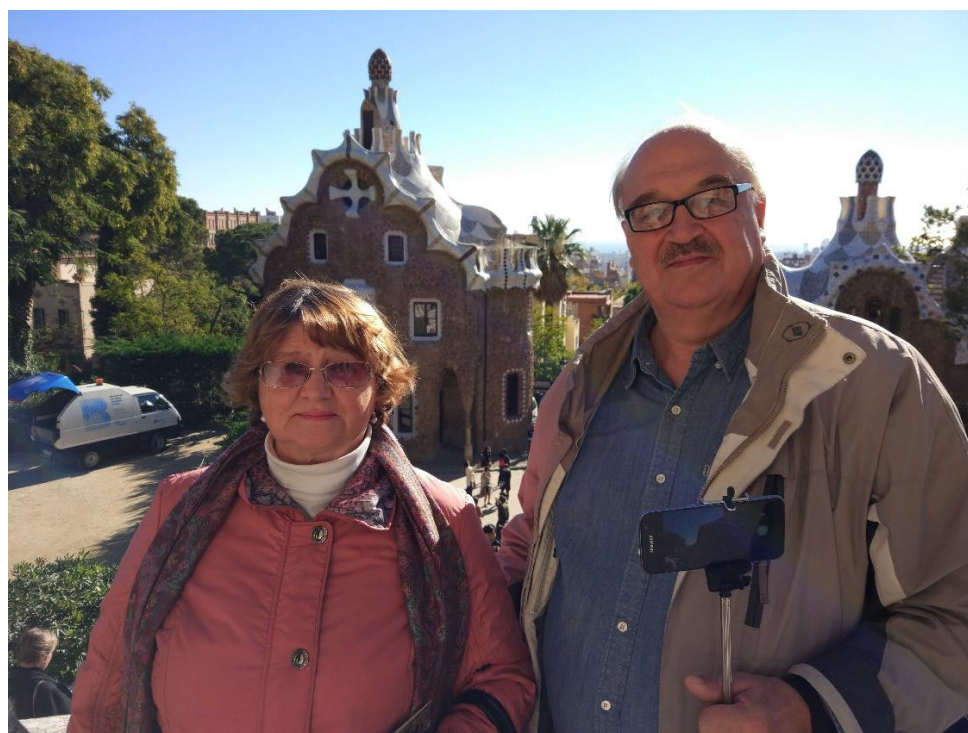



Olga Odínokova and Sergey Odínokov at Park Güell during the Holography Conference, Barcelona, Spain, 15 November, 2017

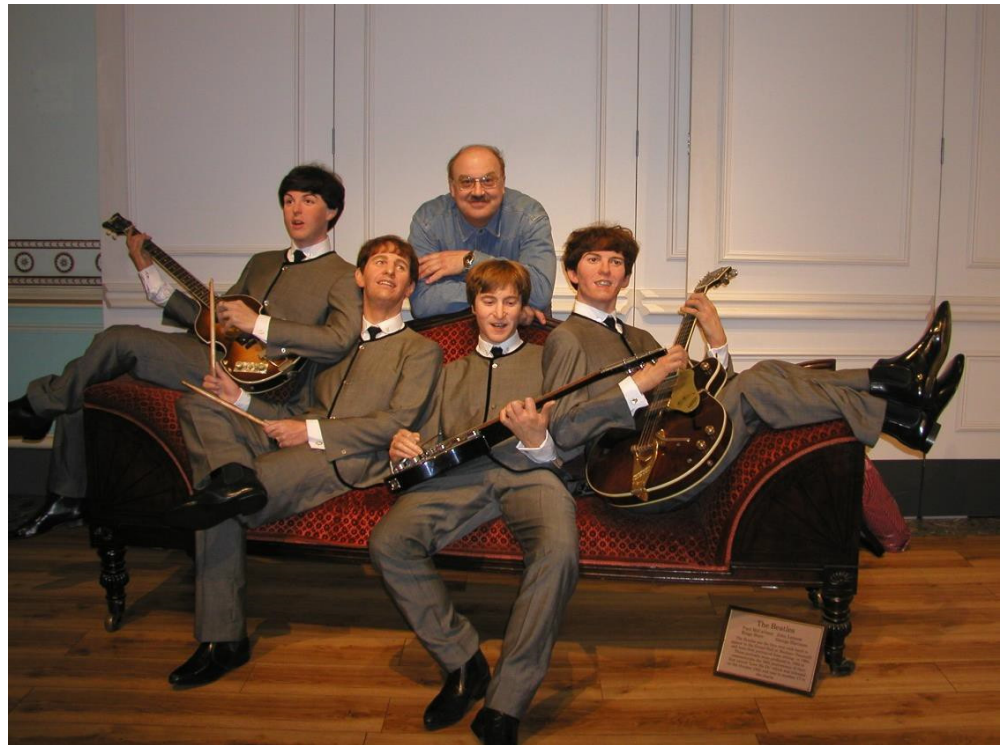

Sergey Odínokov with one of his favorite bands The Beatles at Madame Tussauds Museum during a trip to a conference, London, 2004

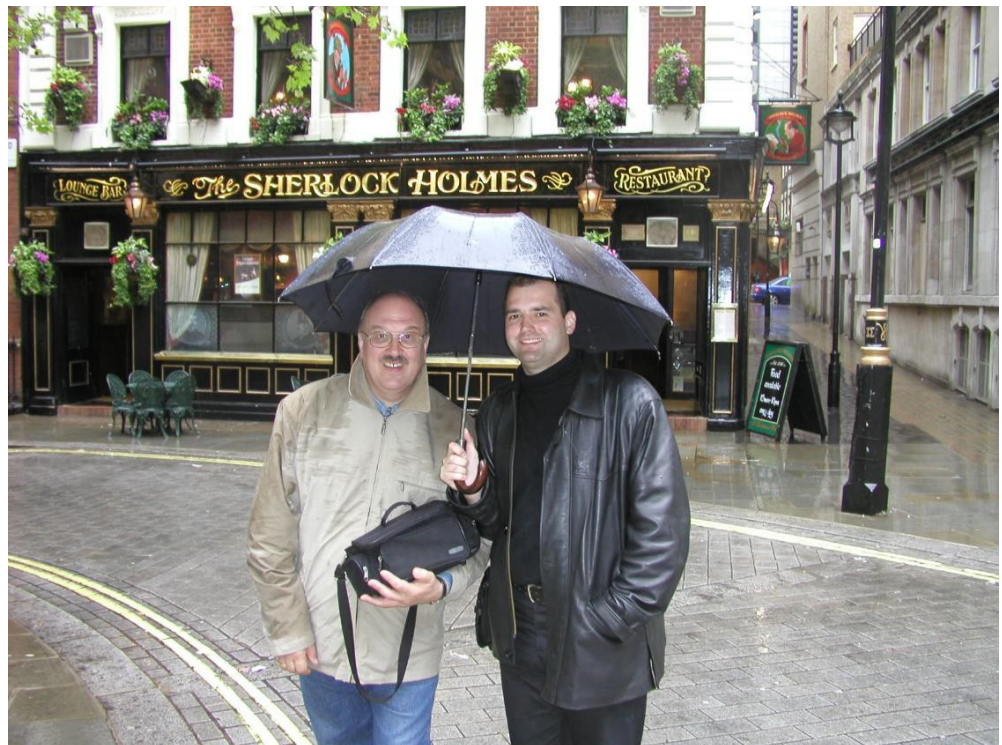

Sergey Odínokov and postgraduate student Alexander Nikolaev during a trip to a conference, London, 2004



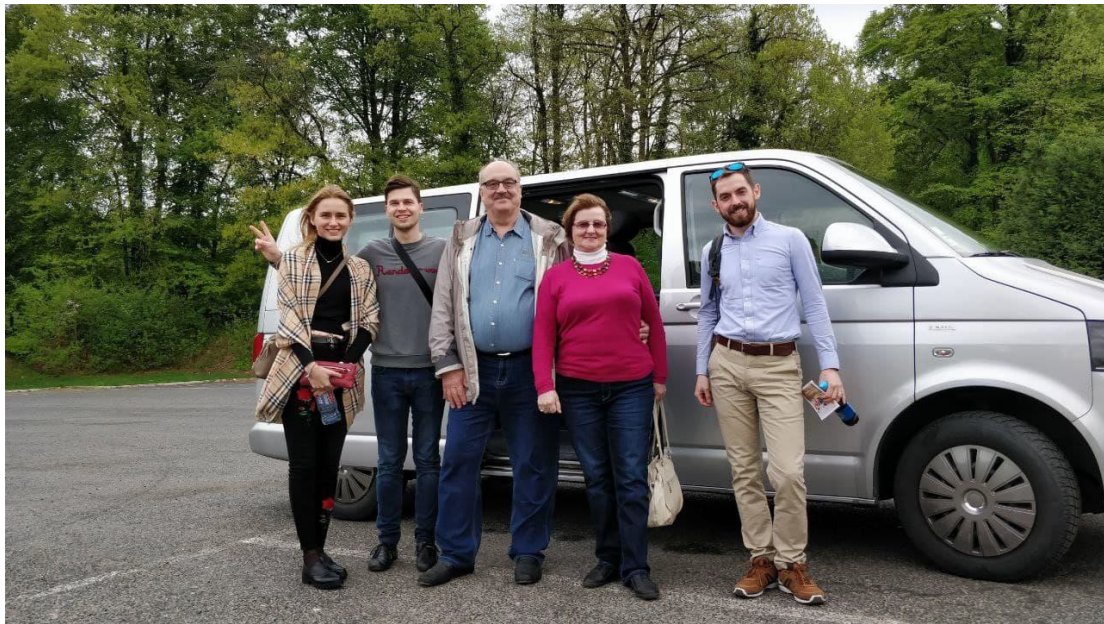

From left to right: Yanina Grad, Vasily Kolyuchkin, Sergey Odinokov, Olga Odionokova, Alexander Zherdev on their way to the conference SPIE Photonics Europe, Strasbourg, France, 2018

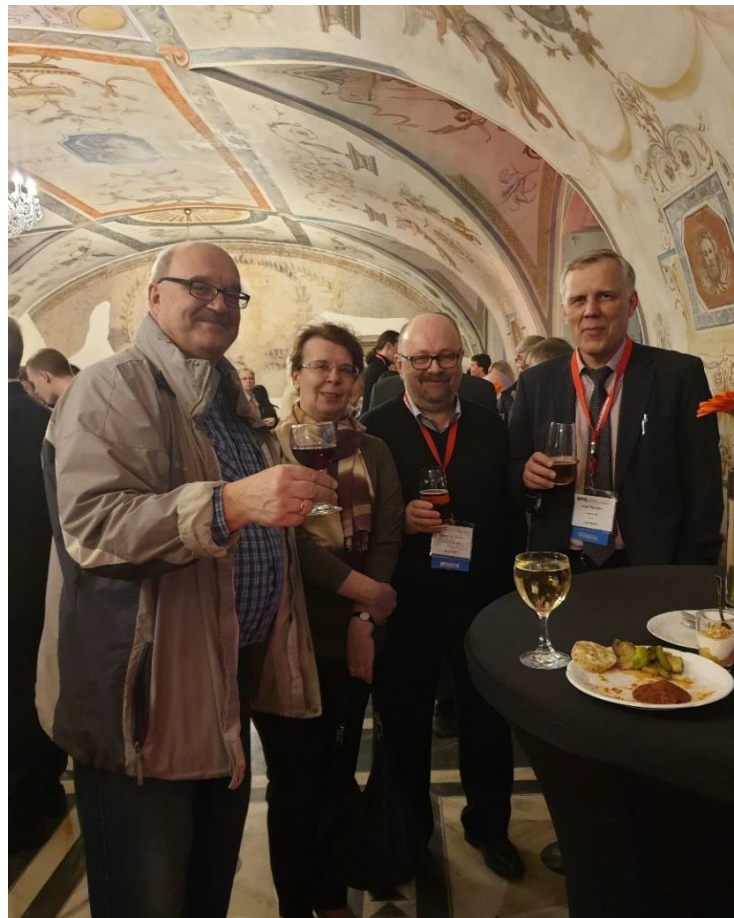

Sergey Odinokov, Tatyana Gutkova, Vladimir Venediktov, Viktor Korolkov, SPIE Optics + Optoelectronics 2019, Prague, Czech Republic, April 1, 2019
